# Supplementary material for: Precarious employment and general, mental and physical health in Stockholm, Sweden: a cross-sectional study
Source: PubMed Central journal article supplement (PMC7917568; doi:10.1177/1403494820956451), 2020-09-16

| <b>Table S1. Weighted sociodemographic characteristics of the sample, overall and stratified by degree of precariousness</b> |                           |           |                                |           |                            |           |              |
|------------------------------------------------------------------------------------------------------------------------------|---------------------------|-----------|--------------------------------|-----------|----------------------------|-----------|--------------|
|                                                                                                                              | <b>Low precariousness</b> |           | <b>Moderate precariousness</b> |           | <b>High precariousness</b> |           | <b>Total</b> |
|                                                                                                                              | %                         | 95 % CI   | %                              | 95 % CI   | %                          | 95 % CI   | %            |
| <b>Sex</b>                                                                                                                   |                           |           |                                |           |                            |           |              |
| Men                                                                                                                          | 48.9                      | 38.5-59.3 | 47.6                           | 36.9-58.6 | 55.2                       | 44.9-64.9 | 50.7         |
| Women                                                                                                                        | 51.1                      | 40.6-61.5 | 52.4                           | 41.4-63.1 | 44.8                       | 35.1-55.1 | 49.3         |
| <b>Age</b>                                                                                                                   |                           |           |                                |           |                            |           |              |
| 18-24                                                                                                                        | 16.1                      | 9.5-25.9  | 35.2                           | 25.5-46.4 | 48.1                       | 38.1-58.2 | 33.7         |
| 25-29                                                                                                                        | 48.4                      | 38.1-58.9 | 40.6                           | 30.6-51.6 | 38.9                       | 29.8-49.1 | 42.5         |
| 30-35                                                                                                                        | 16.6                      | 9.8-26.5  | 20.8                           | 12.9-31.7 | 2.6                        | 1.19-5.6  | 13           |
| 36-62                                                                                                                        | 18.9                      | 11.6-29.3 | 3.3                            | 0.96-11.1 | 10.4                       | 5.3-19.3  | 10.8         |
| <b>Education</b>                                                                                                             |                           |           |                                |           |                            |           |              |
| High school                                                                                                                  | 38.9                      | 29.2-49.6 | 42.3                           | 31.8-53.5 | 57.1                       | 46.6-67   | 46.2         |
| Higher education <2 y                                                                                                        | 27.4                      | 18.7-38.1 | 21.4                           | 13.7-31.7 | 19.5                       | 13.3-27.6 | 22.7         |
| Higher education ≥3 y                                                                                                        | 33.7                      | 24.3-44.6 | 36.3                           | 26.5-47.5 | 23.5                       | 15.3-34.3 | 31.1         |
| <b>Country of birth</b>                                                                                                      |                           |           |                                |           |                            |           |              |
| Swedish                                                                                                                      | 82.6                      | 72.4-89.5 | 84.4                           | 75.1-90.7 | 72.5                       | 62.6-80.5 | 79.6         |
| Non-Swedish                                                                                                                  | 17.4                      | 10.5-27.6 | 15.5                           | 9.3-24.9  | 27.5                       | 19.4-37.4 | 20.4         |
| <b>Previous unemployment</b>                                                                                                 |                           |           |                                |           |                            |           |              |
| Yes                                                                                                                          | 23.8                      | 16.3-33.2 | 39.4                           | 29.5-50.4 | 53.5                       | 43.2-63.4 | 39.4         |
| No                                                                                                                           | 76.2                      | 66.7-83.7 | 60.5                           | 49.6-70.5 | 46.5                       | 36.6-56.8 | 60.5         |
| <b>Family composition</b>                                                                                                    |                           |           |                                |           |                            |           |              |
| Single                                                                                                                       | 52.1                      | 41.5-62.6 | 57.8                           | 47.5-67.6 | 57.8                       | 47.5-67.6 | 55.9         |
| Single w. children                                                                                                           | 13.9                      | 8.4-22.1  | 17.6                           | 11.1-26.7 | 17.6                       | 11.1-26.7 | 17.1         |
| Married/cohabiting w/wo children                                                                                             | 33.9                      | 24.4-45.1 | 24.6                           | 16.9-34.3 | 24.6                       | 16.9-34.3 | 27.1         |
| <b>Occupational social class</b>                                                                                             |                           |           |                                |           |                            |           |              |
| Manual                                                                                                                       | 55.6                      | 44.5-66.2 | 52.3                           | 41.2-63.2 | 74.2                       | 64.9-81.7 | 61.3         |
| Non-manual                                                                                                                   | 44.4                      | 33.8-55.5 | 47.7                           | 36.8-58.8 | 25.8                       | 18.3-35.1 | 38.7         |

| <b>Table S2. Weighted prevalence ratios with 95% CI's for general health, mental health and pain</b>                                               |                       |                |                      |                |            |                |
|----------------------------------------------------------------------------------------------------------------------------------------------------|-----------------------|----------------|----------------------|----------------|------------|----------------|
|                                                                                                                                                    | <b>General health</b> |                | <b>Mental health</b> |                | <b>MSP</b> |                |
| <b>Crude model</b>                                                                                                                                 | <i>PR</i>             | <i>95 % CI</i> | <i>PR</i>            | <i>95 % CI</i> | <i>PR</i>  | <i>95 % CI</i> |
| Low precariousness                                                                                                                                 | 1                     |                | 1                    |                | 1          |                |
| Moderate precariousness                                                                                                                            | 1.27                  | 0.72-2.24      | 1.10                 | 0.68-1.77      | 0.71       | 0.45-1.11      |
| High precariousness                                                                                                                                | 1.63                  | 0.98-2.72      | 1.50                 | 0.99-2.27      | 0.89       | 0.60-1.31      |
| <b>Adjusted model 1<sup>a</sup></b>                                                                                                                |                       |                |                      |                |            |                |
| Low precariousness                                                                                                                                 | 1                     |                | 1                    |                | 1          |                |
| Moderate precariousness                                                                                                                            | 1.81                  | 1.03-3.2       | 1.13                 | 0.71-1.79      | 0.85       | 0.55-1.31      |
| High precariousness                                                                                                                                | 2.49                  | 1.47-4.22      | 1.87                 | 1.27-2.77      | 1.28       | 0.88-1.86      |
| <b>Adjusted model 2<sup>b</sup></b>                                                                                                                |                       |                |                      |                |            |                |
| Low precariousness                                                                                                                                 | 1                     |                | 1                    |                | 1          |                |
| Moderate precariousness                                                                                                                            | 1.69                  | 0.95-3.01      | 1.20                 | 0.75-1.94      | 0.80       | 0.54-1.18      |
| High precariousness                                                                                                                                | 2.38                  | 1.35-4.18      | 2.03                 | 1.34-3.09      | 1.15       | 0.75-1.76      |
| <sup>a</sup> Adjusted for sex, age (continuous), education and occupational social class                                                           |                       |                |                      |                |            |                |
| <sup>b</sup> Adjusted for sex, age (continuous), education, occupational social class, previous unemployment, birth country and family composition |                       |                |                      |                |            |                |

Figure S1. DAG of precarious employment and general health

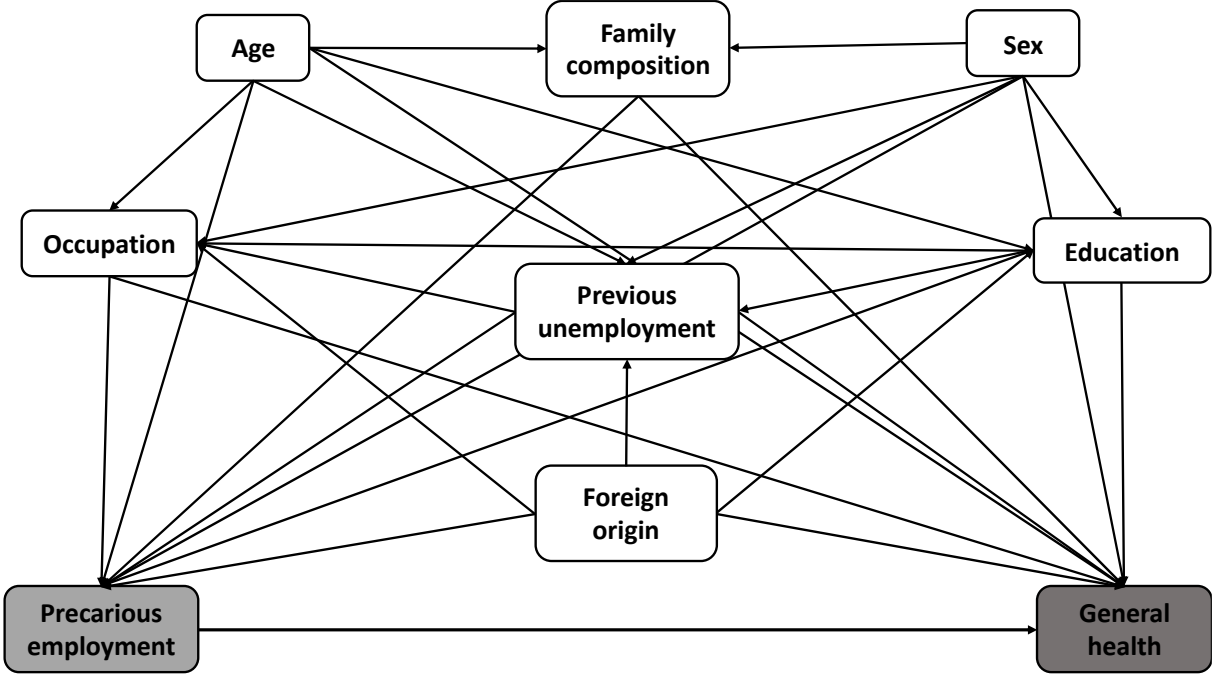

Figure S2. DAG of precarious employment and mental health

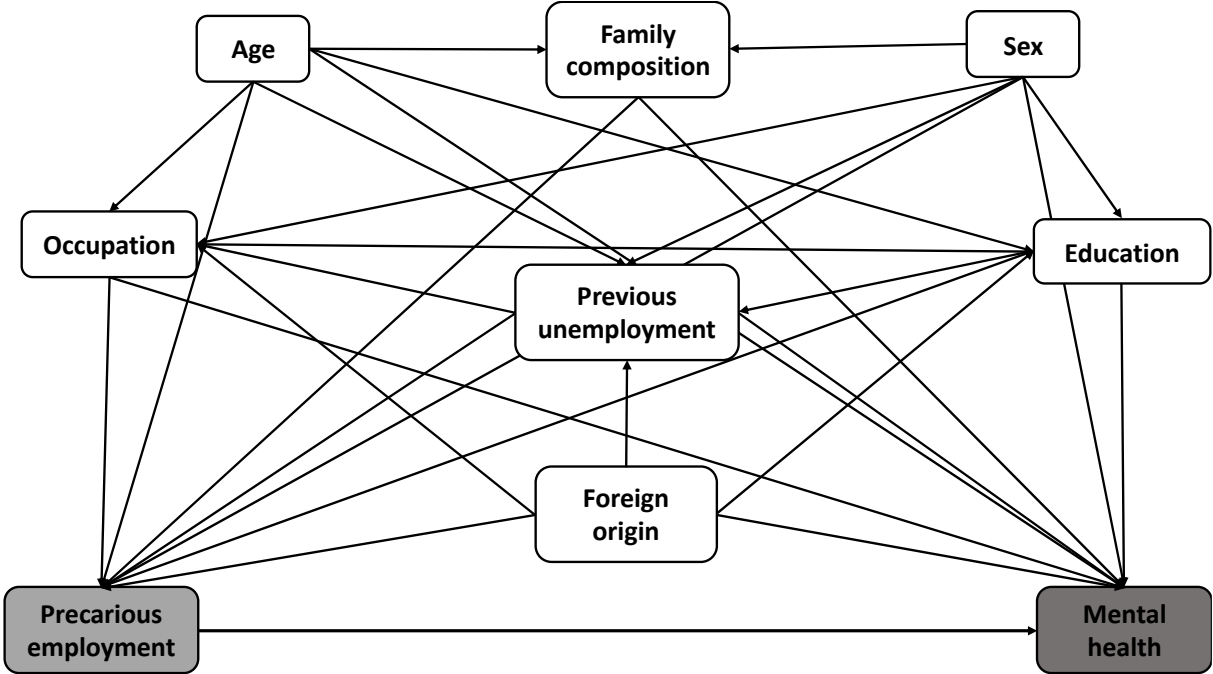

Figure S3. DAG of precarious employment and MSP

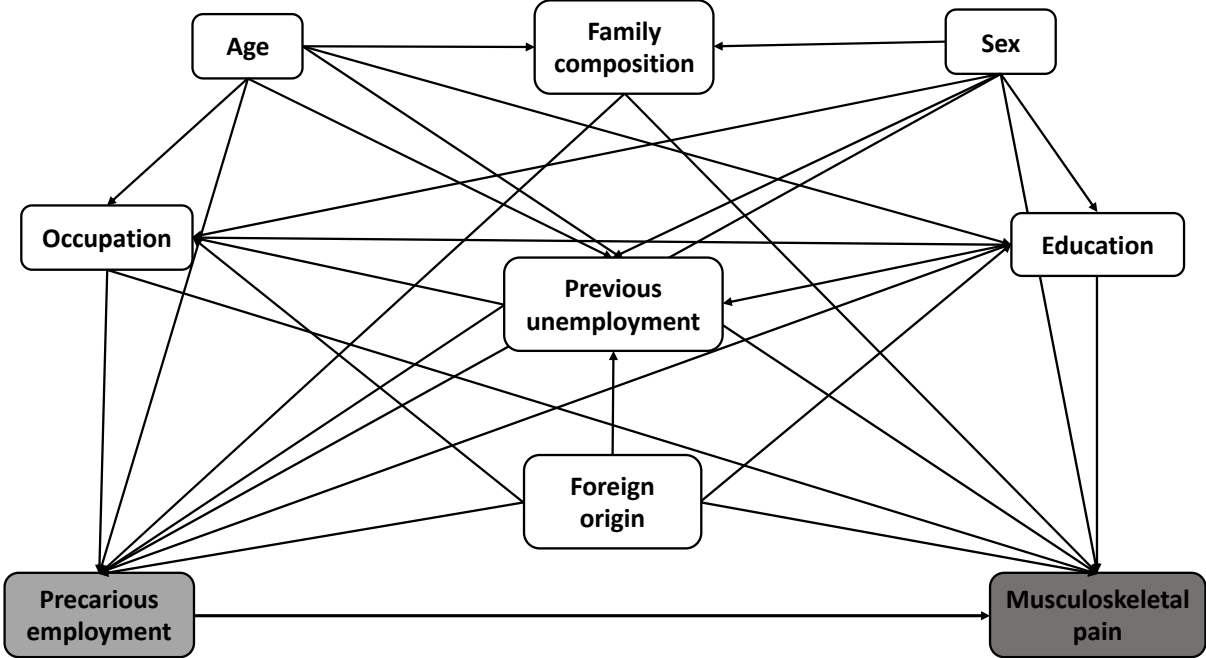

Supplement: SJP956451_Supplemental_material.pdf [file SJP956451_Supplemental_material.pdf]
